# Supplementary material for: Contribution of the Oral and Gastrointestinal Microbiomes to Bloodstream Infections in Leukemia Patients
Source: PubMed Central journal article supplement (PMC10269818; doi:10.1128/spectrum.00415-23), 2023-04-06
Supplement: spectrum.00415-23-s0001.pdf [file spectrum.00415-23-s0001.pdf]

**Supplemental Table 1. Phenotypic antibiotic resistances of infectious isolates**

| Patient | Infectious Organism                 | AMK | ATM | FEP | CAZ | CIP | CST | IPM | MEM | TZP | TIM | TOB | CRO | MXF | PEN | TET | TGC | VAN | AMC | ETP | SXT | CLI | ERY | GEN | LVX | LZD | NIT | OXA | RIF | AMP | SAM | CTX | CPD | CEF | DAP | Q-D | STR | CZA | MIN | C/T | CPT |   |   |   |   |   |   |   |   |   |
|---------|-------------------------------------|-----|-----|-----|-----|-----|-----|-----|-----|-----|-----|-----|-----|-----|-----|-----|-----|-----|-----|-----|-----|-----|-----|-----|-----|-----|-----|-----|-----|-----|-----|-----|-----|-----|-----|-----|-----|-----|-----|-----|-----|---|---|---|---|---|---|---|---|---|
| B001    | <i>Pseudomonas aeruginosa</i>       | S   | S   | I   | S   | R   | S   | R   | R   | S   | R   | S   | -   | -   | -   | -   | -   | -   | -   | -   | -   | -   | -   | -   | -   | -   | -   | -   | -   | -   | -   | -   | -   | -   | -   | -   | -   | -   | -   | -   | -   | - |   |   |   |   |   |   |   |   |
| B002    | <i>Streptococcus mitis</i>          | -   | -   | -   | -   | -   | -   | -   | -   | -   | -   | -   | S   | R   | S   | R   | S   | S   | -   | -   | -   | -   | -   | -   | -   | -   | -   | -   | -   | -   | -   | -   | -   | -   | -   | -   | -   | -   | -   | -   | -   | - | - |   |   |   |   |   |   |   |
| B003    | <i>Escherichia coli</i>             | S   | -   | S   | -   | R   | -   | S   | S   | S   | I   | S   | -   | R   | -   | -   | S   | -   | I   | S   | R   | -   | -   | -   | -   | -   | -   | -   | -   | -   | -   | -   | -   | -   | -   | -   | -   | -   | -   | -   | -   | - | - |   |   |   |   |   |   |   |
| B004    | <i>Staphylococcus epidermidis</i>   | -   | -   | -   | -   | -   | -   | -   | -   | -   | -   | -   | -   | -   | -   | R   | S   | S   | -   | -   | -   | S   | R   | S   | R   | S   | S   | R   | I   | -   | -   | -   | -   | -   | -   | -   | -   | -   | -   | -   | -   | - | - |   |   |   |   |   |   |   |
| B005    | <i>Streptococcus oralis</i>         | -   | -   | -   | -   | -   | -   | -   | -   | -   | -   | -   | S   | R   | I   | R   | S   | S   | -   | -   | -   | -   | -   | -   | -   | -   | -   | -   | -   | -   | -   | -   | -   | -   | -   | -   | -   | -   | -   | -   | -   | - | - |   |   |   |   |   |   |   |
| B006    | <i>Staphylococcus epidermidis</i>   | -   | -   | -   | -   | -   | -   | -   | -   | -   | -   | -   | -   | -   | -   | -   | R   | S   | S   | -   | -   | R   | R   | R   | R   | R   | S   | R   | S   | -   | -   | -   | -   | -   | -   | -   | -   | -   | -   | -   | -   | - | - | - |   |   |   |   |   |   |
| B007    | <i>Pseudomonas aeruginosa</i>       | S   | S   | S   | -   | S   | -   | S   | -   | S   | S   | S   | -   | -   | -   | -   | -   | -   | -   | -   | -   | -   | -   | -   | -   | -   | -   | -   | -   | -   | -   | -   | -   | -   | -   | -   | -   | -   | -   | -   | -   | - | - | - |   |   |   |   |   |   |
| B008    | <i>Streptococcus mitis</i>          | -   | -   | -   | -   | -   | -   | -   | -   | -   | -   | -   | S   | R   | I   | R   | S   | S   | -   | -   | -   | -   | -   | -   | -   | -   | -   | -   | -   | -   | -   | -   | -   | -   | -   | -   | -   | -   | -   | -   | -   | - | - | - |   |   |   |   |   |   |
| B009    | <i>Escherichia coli</i>             | S   | -   | S   | -   | R   | -   | S   | -   | S   | R   | R   | -   | R   | -   | -   | S   | -   | R   | S   | R   | -   | -   | -   | -   | -   | -   | -   | -   | -   | -   | -   | -   | -   | -   | -   | -   | -   | -   | -   | -   | - | - | - | - |   |   |   |   |   |
| B010    | <i>Escherichia coli</i>             | S   | S   | S   | S   | R   | -   | S   | S   | S   | -   | S   | S   | R   | -   | -   | S   | -   | S   | S   | -   | -   | S   | R   | -   | S   | R   | -   | S   | -   | R   | R   | S   | S   | R   | -   | -   | -   | -   | -   | -   | - | - | - | - |   |   |   |   |   |
| B011    | <i>Staphylococcus aureus (MRSA)</i> | -   | -   | -   | -   | -   | -   | -   | -   | -   | -   | -   | -   | -   | -   | S   | S   | S   | -   | -   | S   | S   | R   | S   | S   | R   | S   | S   | R   | S   | -   | -   | -   | -   | -   | -   | S   | -   | -   | -   | -   | - | - | - |   |   |   |   |   |   |
| B012    | <i>Enterococcus faecium, VRE</i>    | -   | -   | -   | -   | -   | -   | -   | -   | -   | -   | -   | -   | -   | -   | R   | -   | R   | -   | -   | -   | -   | -   | R   | R   | I   | S   | -   | R   | -   | -   | -   | -   | -   | -   | -   | -   | S   | S   | -   | -   | - | - | - |   |   |   |   |   |   |
| B013    | <i>Streptococcus oralis</i>         | -   | -   | -   | -   | -   | -   | -   | -   | -   | -   | -   | R   | S   | R   | R   | S   | S   | -   | -   | -   | -   | -   | -   | -   | -   | S   | -   | -   | -   | -   | -   | -   | -   | -   | -   | -   | S   | -   | -   | -   | - | - | - | - |   |   |   |   |   |
| B014    | <i>Pseudomonas aeruginosa</i>       | S   | S   | S   | S   | S   | -   | S   | S   | S   | S   | S   | -   | -   | -   | -   | -   | -   | -   | -   | -   | -   | -   | -   | -   | -   | -   | -   | -   | -   | -   | -   | -   | -   | -   | -   | -   | -   | -   | -   | -   | - | - | - | - |   |   |   |   |   |
| B015    | <i>Staphylococcus epidermidis</i>   | -   | -   | -   | -   | -   | -   | -   | -   | -   | -   | -   | -   | -   | -   | -   | S   | S   | S   | -   | -   | R   | R   | R   | R   | R   | R   | S   | R   | S   | -   | -   | -   | -   | -   | -   | -   | -   | -   | -   | -   | - | - | - | - |   |   |   |   |   |
| B016    | <i>Streptococcus sanguinis</i>      | -   | -   | -   | -   | -   | -   | -   | -   | -   | -   | -   | S   | R   | S   | R   | S   | S   | -   | -   | -   | -   | -   | -   | -   | -   | -   | -   | -   | -   | -   | -   | -   | -   | -   | -   | -   | -   | -   | -   | -   | - | - | - | - |   |   |   |   |   |
| B017    | <i>Staphylococcus epidermidis</i>   | -   | -   | -   | -   | -   | -   | -   | -   | -   | -   | -   | -   | -   | -   | S   | S   | S   | -   | -   | -   | -   | R   | R   | R   | R   | -   | S   | R   | S   | -   | -   | -   | -   | -   | -   | -   | -   | -   | -   | -   | - | - | - | - |   |   |   |   |   |
| B018    | <i>Enterococcus faecalis</i>        | -   | -   | -   | -   | -   | -   | -   | -   | -   | -   | -   | -   | -   | -   | R   | -   | S   | -   | -   | -   | -   | -   | R   | R   | S   | S   | -   | S   | -   | -   | -   | -   | -   | -   | -   | -   | S   | R   | -   | -   | - | - | - | - |   |   |   |   |   |
| B019    | <i>Escherichia coli</i>             | S   | R   | I   | R   | R   | -   | S   | S   | S   | -   | S   | R   | R   | -   | -   | S   | -   | S   | R   | -   | -   | S   | R   | -   | I   | -   | -   | R   | R   | R   | R   | R   | -   | -   | -   | -   | -   | -   | -   | -   | - | - | - | - | - |   |   |   |   |
| B021    | <i>Streptococcus mitis</i>          | -   | -   | -   | -   | -   | -   | -   | -   | -   | -   | -   | S   | S   | R   | S   | S   | S   | -   | -   | -   | -   | -   | -   | -   | -   | -   | -   | -   | -   | -   | -   | -   | -   | -   | -   | -   | -   | -   | -   | -   | - | - | - | - |   |   |   |   |   |
| B022    | <i>Pseudomonas aeruginosa</i>       | S   | S   | S   | S   | S   | -   | S   | S   | S   | I   | S   | -   | -   | -   | -   | -   | -   | -   | -   | -   | -   | -   | -   | -   | -   | -   | -   | -   | -   | -   | -   | -   | -   | -   | -   | -   | -   | -   | -   | -   | - | - | - | - |   |   |   |   |   |
| B023    | <i>Escherichia coli</i>             | S   | S   | S   | S   | R   | -   | S   | S   | S   | -   | S   | S   | R   | -   | -   | S   | -   | -   | -   | S   | R   | -   | -   | R   | R   | -   | S   | -   | -   | R   | I   | S   | -   | R   | -   | -   | -   | -   | -   | -   | - | - | - | - | - |   |   |   |   |
| B024    | <i>Streptococcus mitis</i>          | -   | -   | -   | -   | -   | -   | -   | -   | -   | -   | -   | S   | R   | S   | S   | S   | S   | -   | -   | -   | -   | -   | -   | -   | -   | -   | -   | -   | -   | -   | -   | -   | -   | -   | -   | -   | -   | -   | -   | -   | - | - | - | - | - |   |   |   |   |
| B025    | <i>Pseudomonas aeruginosa</i>       | R   | I   | R   | S   | R   | -   | S   | R   | R   | -   | R   | -   | -   | -   | -   | -   | -   | -   | -   | -   | -   | -   | -   | -   | -   | -   | -   | -   | -   | -   | -   | -   | -   | -   | -   | -   | -   | -   | -   | -   | - | - | - | - | - |   |   |   |   |
| B026    | <i>Enterococcus faecium</i>         | -   | -   | -   | -   | -   | -   | -   | -   | -   | -   | -   | -   | -   | -   | R   | -   | R   | -   | -   | -   | -   | -   | R   | R   | -   | -   | -   | R   | -   | -   | -   | -   | -   | -   | -   | -   | -   | S   | R   | -   | - | - | - | - | - |   |   |   |   |
| B027    | <i>Staphylococcus aureus (MRSA)</i> | -   | -   | -   | -   | -   | -   | -   | -   | -   | -   | -   | -   | -   | -   | -   | S   | S   | -   | -   | S   | R   | T   | S   | R   | S   | -   | R   | S   | -   | -   | -   | -   | -   | -   | -   | -   | -   | S   | -   | -   | - | - | - | - | - |   |   |   |   |
| B028    | <i>Streptococcus mitis</i>          | -   | -   | -   | -   | -   | -   | -   | -   | -   | -   | -   | -   | S   | S   | S   | R   | S   | S   | -   | -   | -   | -   | -   | -   | -   | -   | -   | -   | -   | -   | -   | -   | -   | -   | -   | -   | -   | -   | -   | -   | - | - | - | - | - |   |   |   |   |
| B029    | <i>Escherichia coli</i>             | S   | S   | S   | S   | R   | -   | S   | S   | S   | -   | S   | S   | R   | -   | -   | S   | -   | -   | S   | S   | -   | -   | S   | R   | -   | -   | R   | R   | -   | S   | -   | -   | R   | I   | S   | R   | R   | -   | -   | -   | - | - | - | - | - | - |   |   |   |
| B030    | <i>Escherichia coli</i>             | S   | S   | S   | S   | R   | -   | S   | S   | S   | -   | S   | S   | -   | -   | -   | -   | -   | S   | R   | -   | -   | S   | R   | -   | S   | R   | -   | -   | R   | I   | S   | S   | I   | -   | -   | -   | -   | -   | -   | -   | - | - | - | - | - | - |   |   |   |
| B032    | <i>Staphylococcus epidermidis</i>   | -   | -   | -   | -   | -   | -   | -   | -   | -   | -   | -   | -   | -   | -   | R   | S   | S   | -   | -   | -   | R   | R   | R   | -   | R   | S   | -   | -   | -   | -   | -   | -   | -   | -   | -   | -   | -   | -   | -   | -   | - | - | - | - | - | - |   |   |   |
| B034    | <i>Staphylococcus epidermidis</i>   | -   | -   | -   | -   | -   | -   | -   | -   | -   | -   | -   | -   | -   | -   | -   | R   | S   | S   | -   | -   | S   | R   | S   | R   | S   | -   | R   | I   | -   | -   | -   | -   | -   | -   | -   | -   | -   | -   | -   | -   | - | - | - | - | - | - | - |   |   |
| B035    | <i>Enterococcus faecalis</i>        | -   | -   | -   | -   | -   | -   | -   | -   | -   | -   | -   | -   | -   | -   | R   | -   | S   | -   | -   | -   | -   | -   | -   | -   | -   | S   | -   | -   | -   | -   | -   | -   | -   | -   | -   | -   | -   | -   | -   | -   | - | - | - | - | - | - | - |   |   |
| B036    | <i>Pseudomonas aeruginosa</i>       | S   | I   | S   | S   | S   | -   | S   | S   | S   | -   | S   | -   | -   | -   | -   | -   | -   | -   | -   | -   | -   | -   | -   | -   | -   | -   | -   | -   | -   | -   | -   | -   | -   | -   | -   | -   | -   | -   | -   | -   | - | - | - | - | - | - |   |   |   |
| B037B   | <i>Streptococcus salivarius</i>     | -   | -   | -   | -   | -   | -   | -   | -   | -   | -   | -   | -   | S   | S   | I   | S   | S   | -   | -   | -   | -   | -   | -   | -   | -   | -   | -   | -   | -   | -   | -   | -   | -   | -   | -   | -   | -   | -   | -   | -   | - | - | - | - | - | - |   |   |   |
| B038    | <i>Streptococcus parasanguinis</i>  | -   | -   | -   | -   | -   | -   | -   | -   | -   | -   | -   | -   | S   | I   | R   | S   | S   | -   | -   | -   | -   | -   | -   | -   | -   | -   | -   | -   | -   | -   | -   | -   | -   | -   | -   | -   | -   | -   | -   | -   | - | - | - | - | - | - |   |   |   |
| B039    | <i>Streptococcus mitis</i>          | -   | -   | -   | -   | -   | -   | -   | -   | -   | -   | -   | -   | S   | R   | I   | R   | -   | -   | -   | -   | -   | -   | -   | -   | -   | -   | -   | -   | -   | -   | -   | -   | -   | -   | -   | -   | -   | -   | -   | -   | - | - | - | - | - | - |   |   |   |
| B041    | <i>Escherichia coli</i>             | S   | R   | S   | R   | R   | -   | S   | S   | S   | -   | I   | R   | R   | -   | -   | -   | -   | S   | S   | R   | -   | -   | R   | R   | -   | -   | -   | -   | -   | -   | -   | -   | -   | -   | -   | -   | -   | -   | -   | -   | - | - | - | - | - | - | - |   |   |
| B042    | <i>Staphylococcus epidermidis</i>   | -   | -   | -   | -   | -   | -   | -   | -   | -   | -   | -   | -   | -   | -   | -   | S   | -   | -   | -   | -   | -   | -   | -   | -   | -   | R   | -   | R   | -   | -   | -   | -   | -   | -   | -   | -   | -   | -   | -   | -   | - | - | - | - | - | - | - |   |   |
| B043    | <i>Enterococcus faecium, VRE</i>    | -   | -   | -   | -   | -   | -   | -   | -   | -   | -   | -   | -   | -   | -   | -   | -   | -   | -   | -   | -   | -   | -   | -   | -   | -   | -   | S   | -   | -   | -   | -   | -   | -   | -   | -   | -   | -   | -   | -   | -   | - | - | - | - | - | - | - |   |   |
| B044    | <i>Escherichia coli</i>             | S   | R   | R   | R   | R   | -   | S   | S   | -   | R   | R   | -   | -   | -   | -   | -   | -   | -   | -   | -   | -   | -   | -   | -   | R   | -   | -   | -   | -   | -   | -   | -   | -   | -   | -   | -   | -   | -   | -   | -   | - | - | - | - | - | - | - | - |   |
| B045    | <i>Klebsiella pneumoniae</i>        | S   | R   | R   | R   | R   | -   | S   | R   | R   | -   | R   | -   | -   | -   | -   | -   | -   | -   | -   | -   | -   | -   | -   | -   | R   | -   | -   | -   | -   | -   | -   | -   | -   | -   | -   | -   | -   | -   | -   | -   | - | - | - | - | - | - | - | - |   |
| B047    | <i>Pseudomonas aeruginosa</i>       | I   | -   | I   | S   | R   | -   | S   | I   | -   | S   | -   | -   | -   | -   | -   | -   | -   | -   | -   | -   | -   | -   | -   | R   | -   | -   | -   | -   | -   | -   | -   | -   | -   | -   | -   | -   | -   | -   | -   | -   | - | - | - | - | - | - | - |   |   |
| B048    | <i>Escherichia coli</i>             | S   | S   | S   | S   | R   | -   | S   | S   | -   | S   | S   | -   | -   | -   | -   | -   | -   | -   | -   | -   | -   | -   | -   | S   | -   | -   | -   | -   | -   | -   | -   | -   | -   | -   | -   | -   | -   | -   | -   | -   | - | - | - | - | - | - | - | - |   |
| B049    | <i>Staphylococcus aureus</i>        | -   | -   | -   | -   | -   | -   | -   | -   | -   | -   | -   | -   | -   | -   | -   | -   | -   | -   | -   | -   | -   | -   | -   | -   | -   | -   | -   | -   | -   | -   | -   | -   | -   | -   | -   | -   | -   | -   | -   | -   | - | - | - | - | - | - | - | - |   |
| B050    | <i>Escherichia coli</i>             | S   | S   | R   | R   | R   | -   | S   | R   | -   | R   | R   | -   | -   | -   | -   | -   | -   | -   | -   | -   | -   | -   | -   | -   | -   | -   | -   | -   | -   | -   | -   | -   | -   | -   | -   | -   | -   | -   | -   | -   | - | - | - | - | - | - | - | - |   |
| B052    | <i>Staphylococcus aureus</i>        | -   | -   | -   | -   | -   | -   | -   | -   | -   | -   | -   | -   | -   | -   | -   | -   | -   | -   | -   | -   | -   | -   | -   | -   | -   | -   | -   | -   | -   | -   | -   | -   | -   | -   | -   | -   | -   | -   | -   | -   | - | - | - | - | - | - | - | - |   |
| B053    | <i>Klebsiella pneumoniae</i>        | S   | S   | S   | -   | S   | -   | S   | S   | -   | S   | S   | -   | -   | -   | -   | -   | -   | -   | -   | -   | -   | -   | -   | -   | -   | -   | -   | -   | -   | -   | -   | -   | -   | -   | -   | -   | -   | -   | -   | -   | - | - | - | - | - | - | - | - | - |
| B054    | <i>Enterococcus faecalis</i>        |     |     |     |     |     |     |     |     |     |     |     |     |     |     |     |     |     |     |     |     |     |     |     |     |     |     |     |     |     |     |     |     |     |     |     |     |     |     |     |     |   |   |   |   |   |   |   |   |   |

**Supplemental Table 2: ddPCR Primers and Probes to Confirm of Infectious Agents in Patient Stool Samples.**

|                               |                         |                                               |            |
|-------------------------------|-------------------------|-----------------------------------------------|------------|
| <i>Enterococcus spp.</i>      | Forward                 | GAGAAATTCCAAACGAACTTG                         | Tm: 50°C   |
|                               | Reverse                 | CAGTGCTCTACCTCCATCATT                         | Tm: 54.2°C |
|                               | Probe, Dye and Quencher | TGGTTCTCTCCGAAATAGCTTTAGGGCTA<br>6-FAM; BHQ-1 | Tm: 60.3°C |
| <i>Escherichia coli</i>       | Forward                 | TCACGCCGTATGTTATTG                            | Tm: 49.4°C |
|                               | Reverse                 | GTCGGTAATCACCATTC                             | Tm: 49.8°C |
|                               | Probe, Dye and Quencher | TGCCAGTTCAGTTCGTTGTTCAC<br>6-FAM; BHQ-1       | Tm: 58°C   |
| <i>Klebsiella pneumoniae</i>  | Forward                 | GGGCGAGGTTTACGTCTCAA                          | Tm: 57.8°C |
|                               | Reverse                 | GCGTGTGGATAAGAGGTGCG                          | Tm: 58.2°C |
|                               | Probe, Dye and Quencher | CCACCACGAGCGGCTGCC<br>6-FAM; BHQ-1            | Tm: 64.7°C |
| <i>Pseudomonas aeruginosa</i> | Forward                 | TTCAACGAGAACCTGCTCTG                          | Tm: 55.5°C |
|                               | Reverse                 | CGGCCTCGATGTAGTTGTT                           | Tm: 54.9°C |
|                               | Probe, Dye and Quencher | CTTCACCAACAACATCCCGCAGC<br>6-FAM; BHQ-1       | Tm: 59°C   |
| <i>Staphylococcus aureus</i>  | Forward                 | GAGTTTGGTGCCTTTACAGATAG                       | Tm: 53.4°C |
|                               | Reverse                 | AGCAAGCTTTAACTCATAGTGG                        | Tm: 52.8°C |
|                               | Probe, Dye and Quencher | TGCCATACAGTCATTTACGCAAAGTGG<br>6-FAM; BHQ-1   | Tm: 59.8°C |
|                               | Forward                 | ATCAAAAAGTTGGCGAACCTTTTCA                     | Tm: 56.9°C |
|                               | Reverse                 | CAAAAAGAGCGTGGAGAAAAGTATC                     | Tm: 54.1°C |

|                                   |                         |                                                |            |
|-----------------------------------|-------------------------|------------------------------------------------|------------|
| <i>Staphylococcus epidermidis</i> | Probe, Dye and Quencher | CCATTTGCATAGTCTGATTGCTCAAAGTCT<br>6-FAM; BHQ-1 | Tm: 59.0°C |
| <i>Streptococcus mitis</i>        | Forward                 | TGCCCTTCCACTCAATTAGAC                          | Tm: 54.9°C |
|                                   | Reverse                 | GAACCGTTGTTCCAGTCCTATC                         | Tm: 55.3°C |
|                                   | Probe, Dye and Quencher | TACCGTCGTGGTCATGTTGTTGCT<br>6-FAM; BHQ-1       | Tm: 56.2°C |
| <i>Streptococcus oralis</i>       | Forward                 | GATTACCTTTGCGGAACGTTTG                         | Tm: 54.8°C |
|                                   | Reverse                 | GGCTAGAAGAGAGAGGAGTTGA                         | Tm: 55.3°C |
|                                   | Probe, Dye and Quencher | CGATCAATCTGGTGCCCTTCGTGA<br>6-FAM; BHQ-1       | Tm: 61.1°C |

**Supplemental Table 3: ddPCR Primers and Probes to Confirm Antibiotic Resistance Gene Presence in Patient Stool Samples.**

|                 |                         |                                               |          |
|-----------------|-------------------------|-----------------------------------------------|----------|
| <i>CTX-M-15</i> | Forward                 | GACTGGGTGTGGCATTGATTAAC                       | Tm: 64°C |
|                 | Reverse                 | CAGATTCGGTTCGCTTTCACCTT                       | Tm: 64°C |
|                 | Probe, Dye and Quencher | ATGAGCGCTTTGCGATGTGCAGCA<br>6-FAM; BHQ-1      | Tm: 71°C |
| <i>CTX-M-14</i> | Forward                 | TGACGTGGCTCAAAGGCAATA                         | Tm: 64°C |
|                 | Reverse                 | TATCATTGGTGGTGCCGTAGTC                        | Tm: 64°C |
|                 | Probe, Dye and Quencher | TGGA CTGTGGGTGATAAGACCGGCA<br>6-FAM; BHQ-1    | Tm: 71°C |
| <i>CfrA</i>     | Forward                 | GATTATATCATGTTGCCTGGTGTAATG                   | Tm: 63°C |
|                 | Reverse                 | CCATACATCTCAGGTGCACTTATTG                     | Tm: 63°C |
|                 | Probe, Dye and Quencher | TCTTGAGCATGCAAACGAGTTGTTAGCCT<br>6-FAM; BHQ-1 | Tm: 70°C |
| <i>VanA</i>     | Forward                 | TCCTGACCAGTCTACGACCAATAC                      | Tm: 65°C |
|                 | Reverse                 | CGGTAATCAAGCAGACTATGCGATAC                    | Tm: 65°C |
|                 | Probe, Dye and Quencher | ACAATCCGGGTGTACTTGTTTCCTTTGCA<br>6-FAM; BHQ-1 | Tm: 70°C |

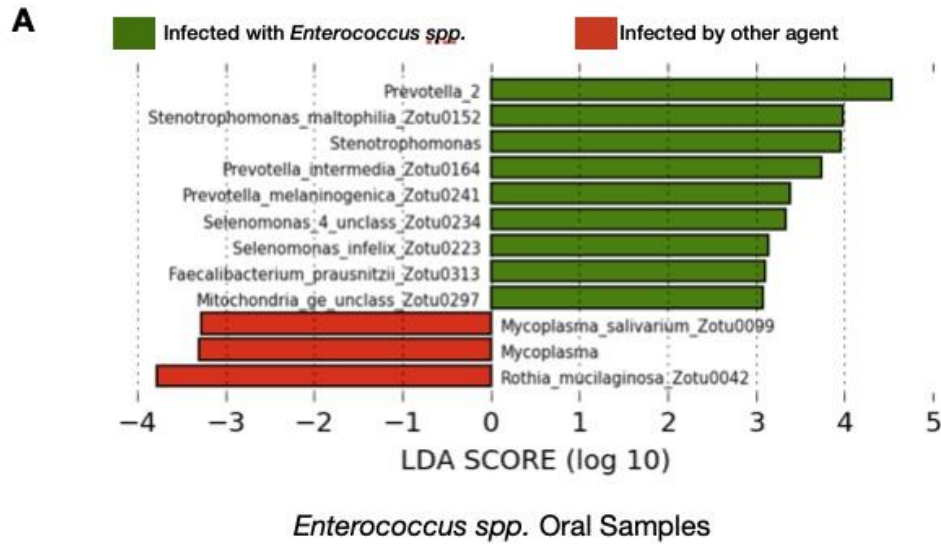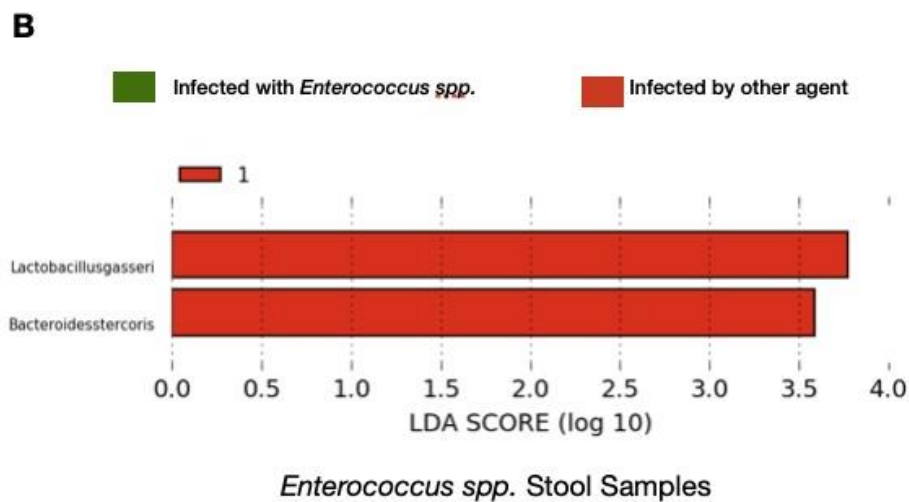

**Supplemental Figure 1. LEfSe analysis of *Enterococcus spp.* infections.** Linear discriminant analysis of effect size was done on oral (A) and stool (B) samples to compare the microbiomes of patients with an *Enterococcus spp.* infection to those without. Organisms with a red bar show enrichment in patients without an *Enterococcus spp.* infection while those with a green bar show enrichment in patients with an *Enterococcus spp.* infection.

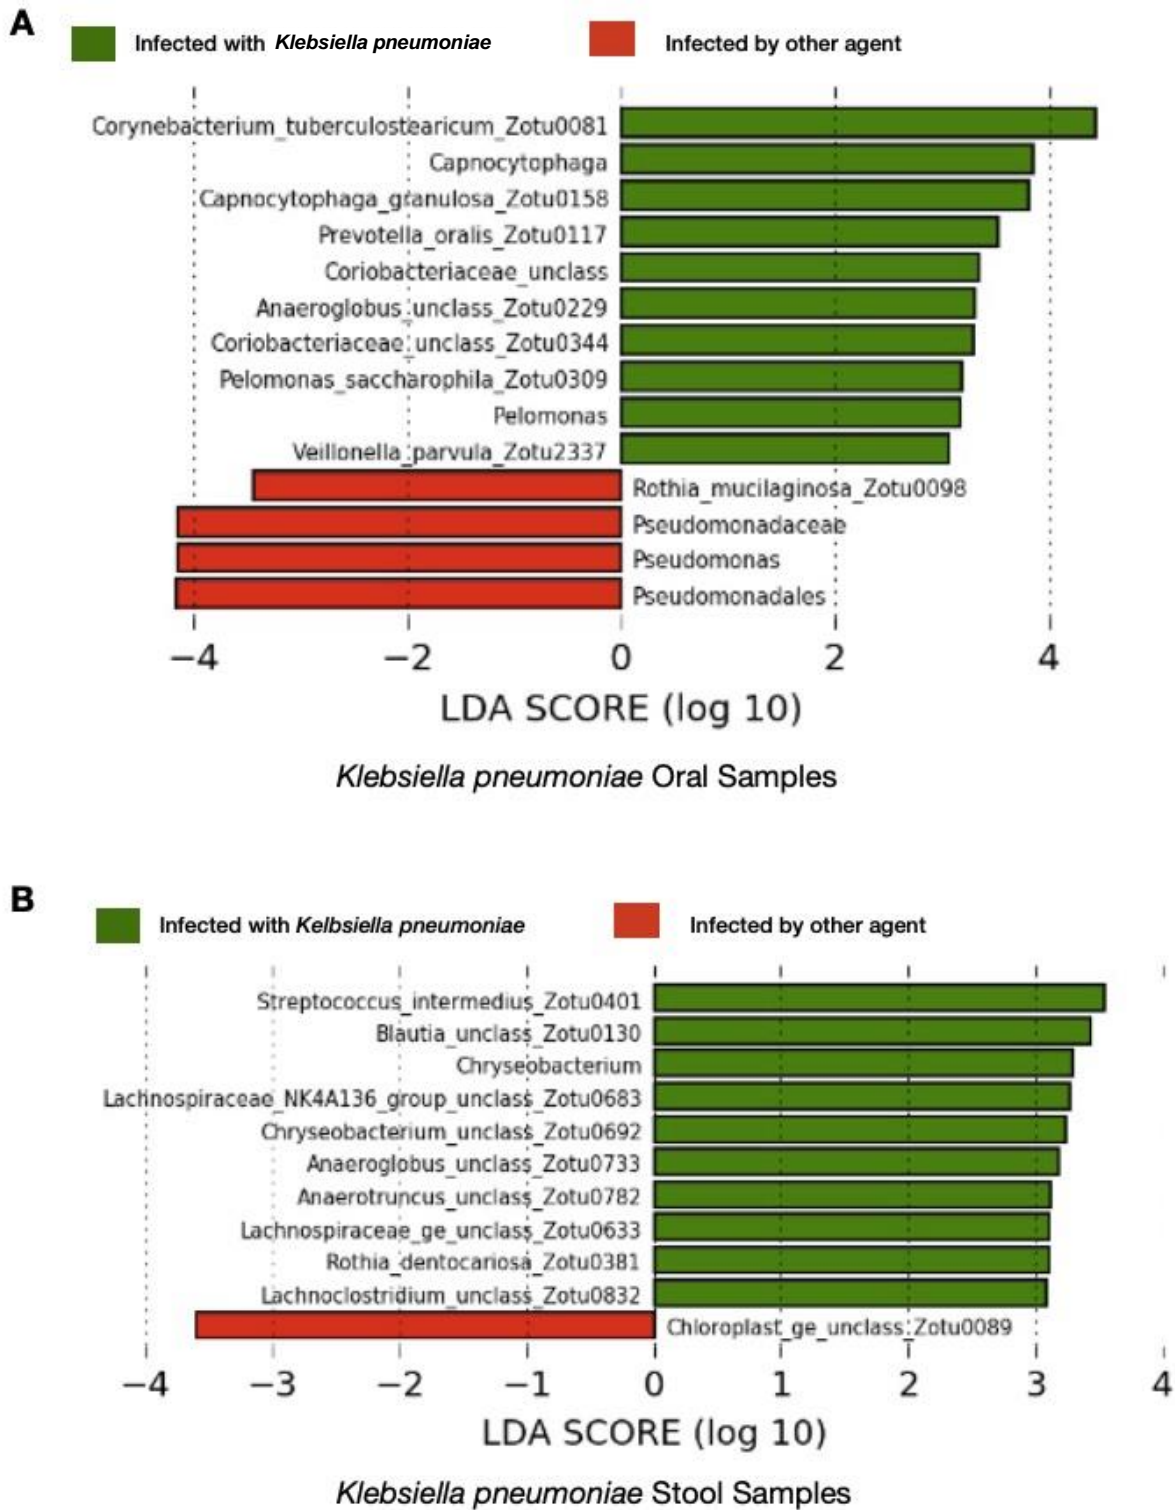

**Supplemental Figure 2. LEfSe analysis of *Klebsiella pneumoniae* infections.** Linear discriminant analysis of effect size was done on oral (A) and stool (B) samples to compare the microbiomes of patients with a *Klebsiella pneumoniae* infection to those without. Organisms with a red bar show enrichment in patients without a *K. pneumoniae* infection while those with a green bar show enrichment in patients with a *K. pneumoniae* infection.



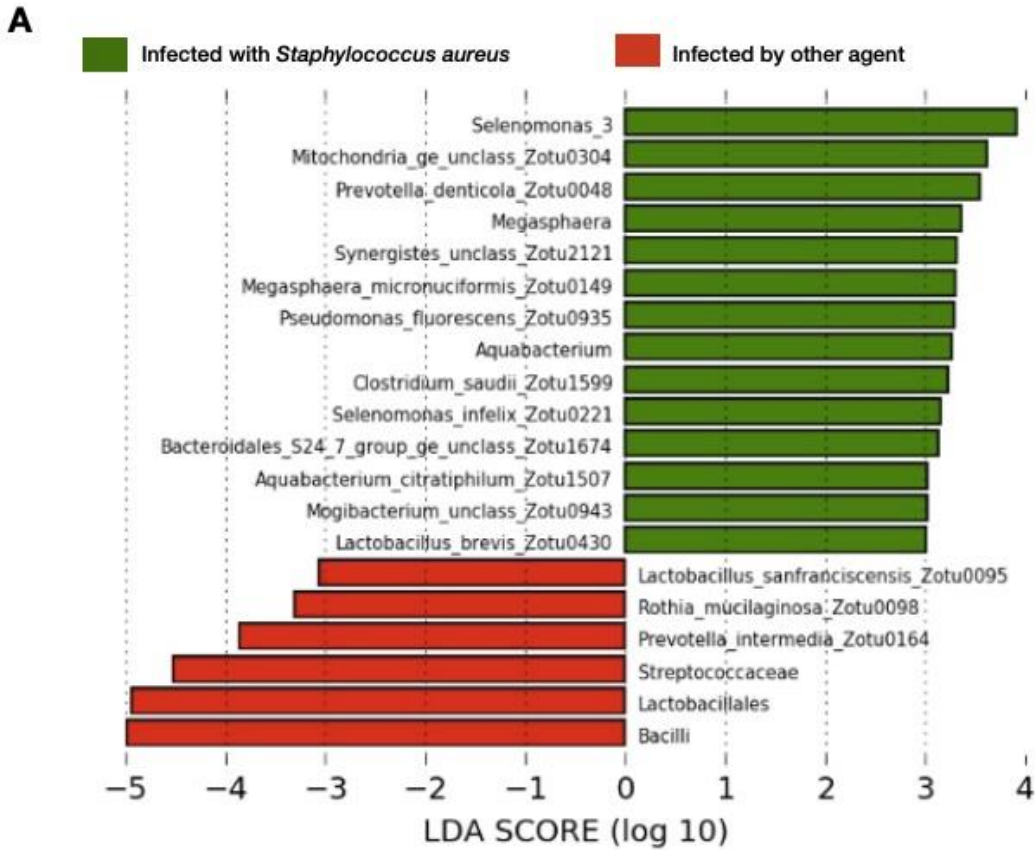

*Staphylococcus aureus* Oral Samples

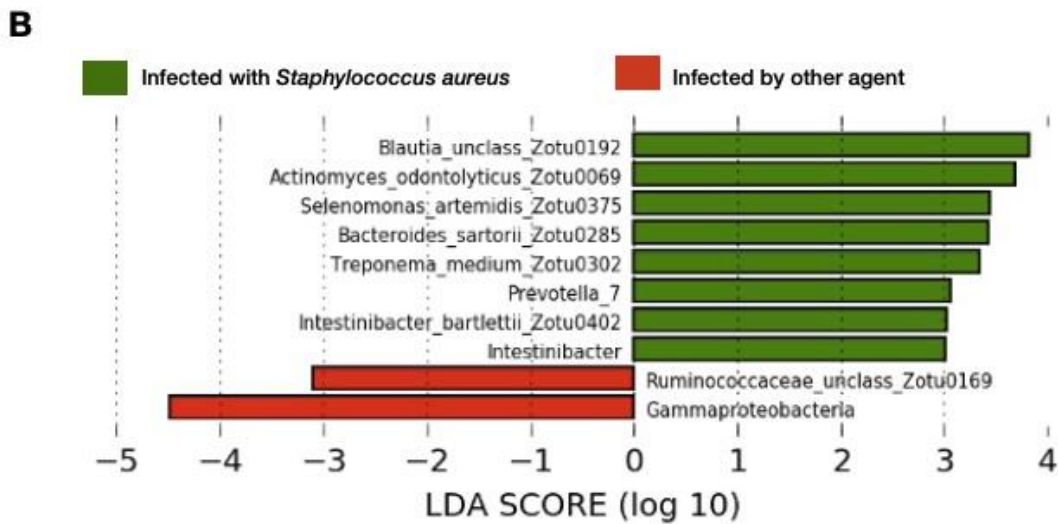

*Staphylococcus aureus* Stool Samples

**Supplemental Figure 3. LEfSe analysis of *Staphylococcus aureus* infections.** Linear discriminant analysis of effect size was done on oral (A) and stool (B) samples to compare the microbiomes of patients with a *Staphylococcus aureus* infection to those without. Organisms with a red bar show enrichment in patients without a *S. aureus* infection while those with a green bar show enrichment in patients with a *S. aureus* infection.

**A**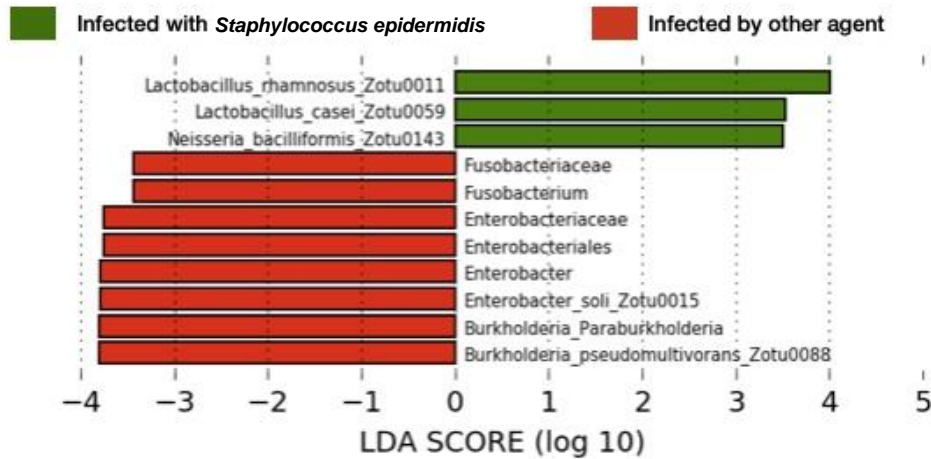*Staphylococcus epidermidis* Oral Samples**B**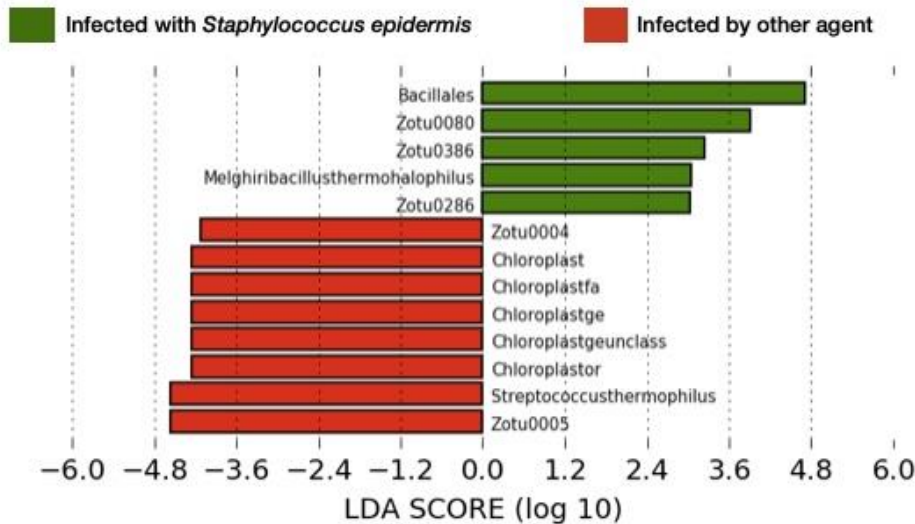*Staphylococcus epidermidis* Stool Samples

**Supplemental Figure 4. LEfSe analysis of *Staphylococcus epidermidis* infections.** Linear discriminant analysis of effect size was done on oral (A) and stool (B) samples to compare the microbiomes of patients with a *Staphylococcus epidermidis* infection to those without. Organisms with a red bar show enrichment in patients without a *S. epidermidis* infection while those with a green bar show enrichment in patients with a *S. epidermidis* infection.



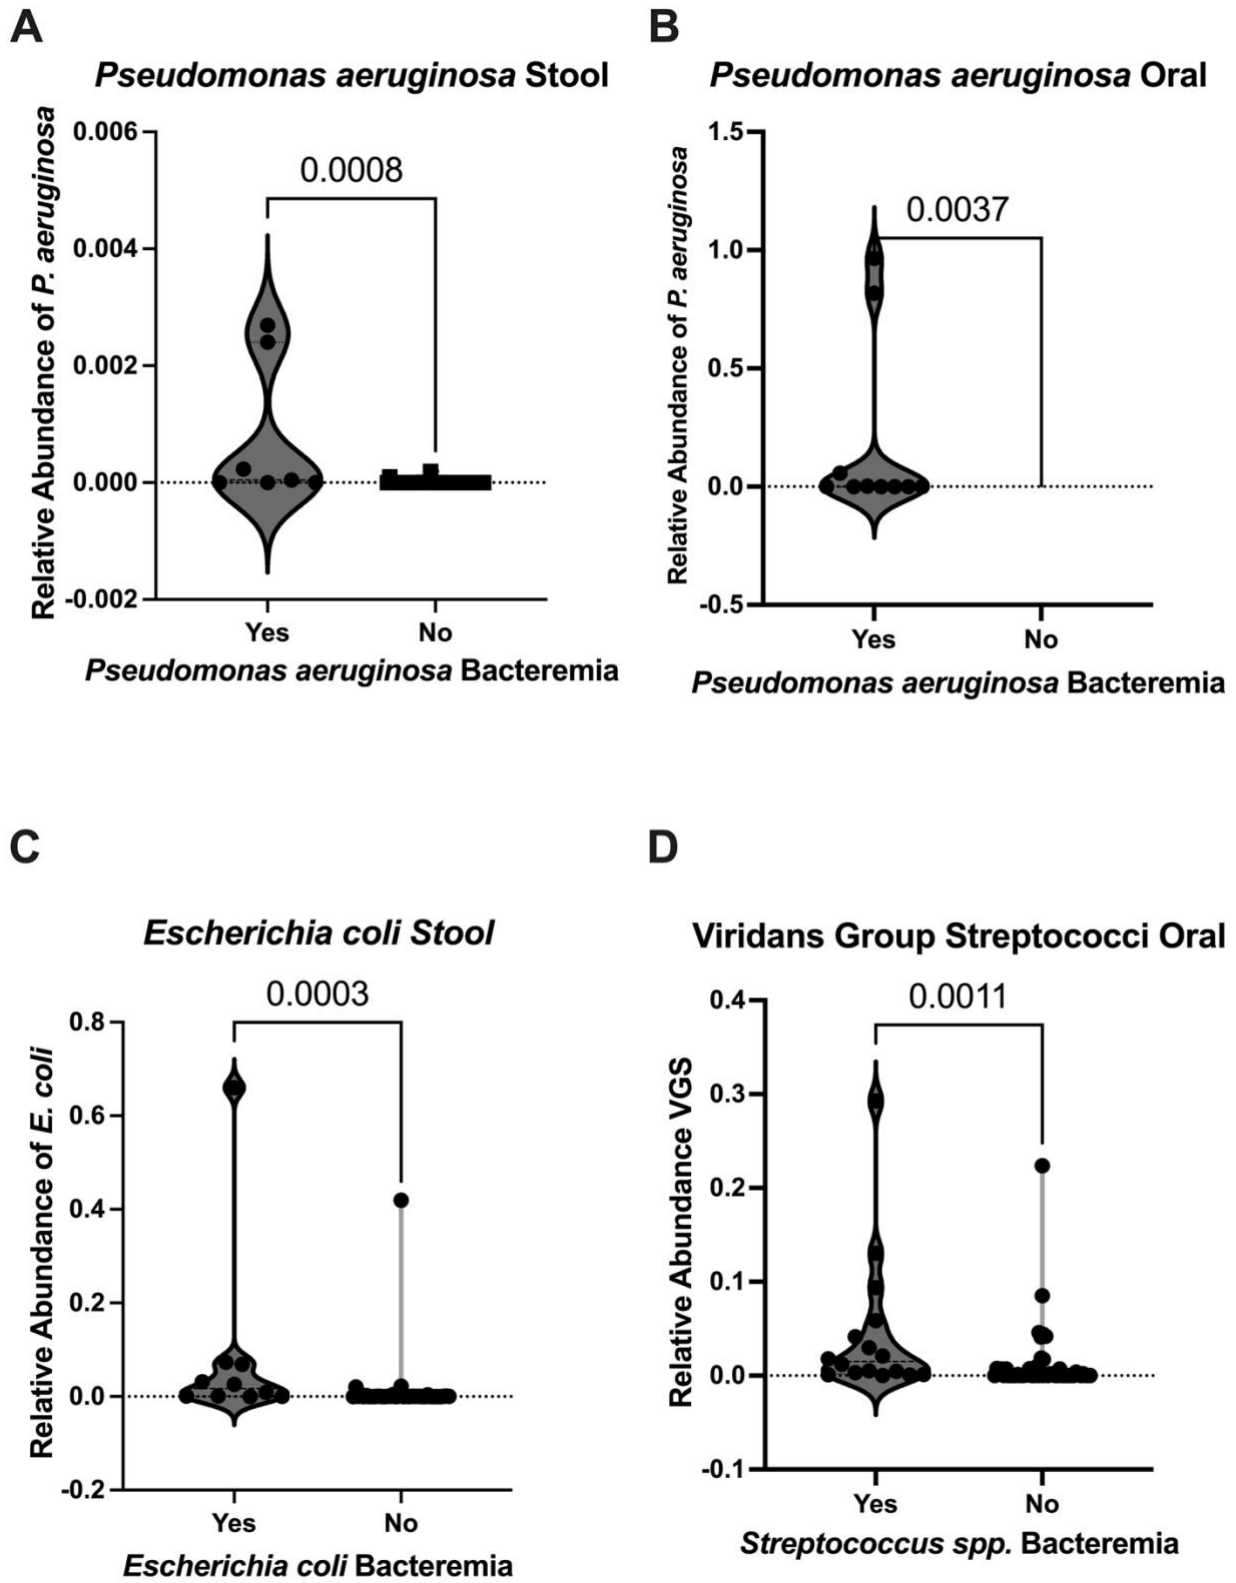

**Supplemental Figure 5. Distribution of infectious taxa between patients with and without respective bacteremias.** Mann-Whitney testing demonstrates that patients with *E. coli* and *P. aeruginosa* bacteremia had higher abundance of the infectious taxa in their stool. Additionally, patients with *P. aeruginosa* and VGS bacteremia had increased abundance of the infectious taxa in the oral samples.

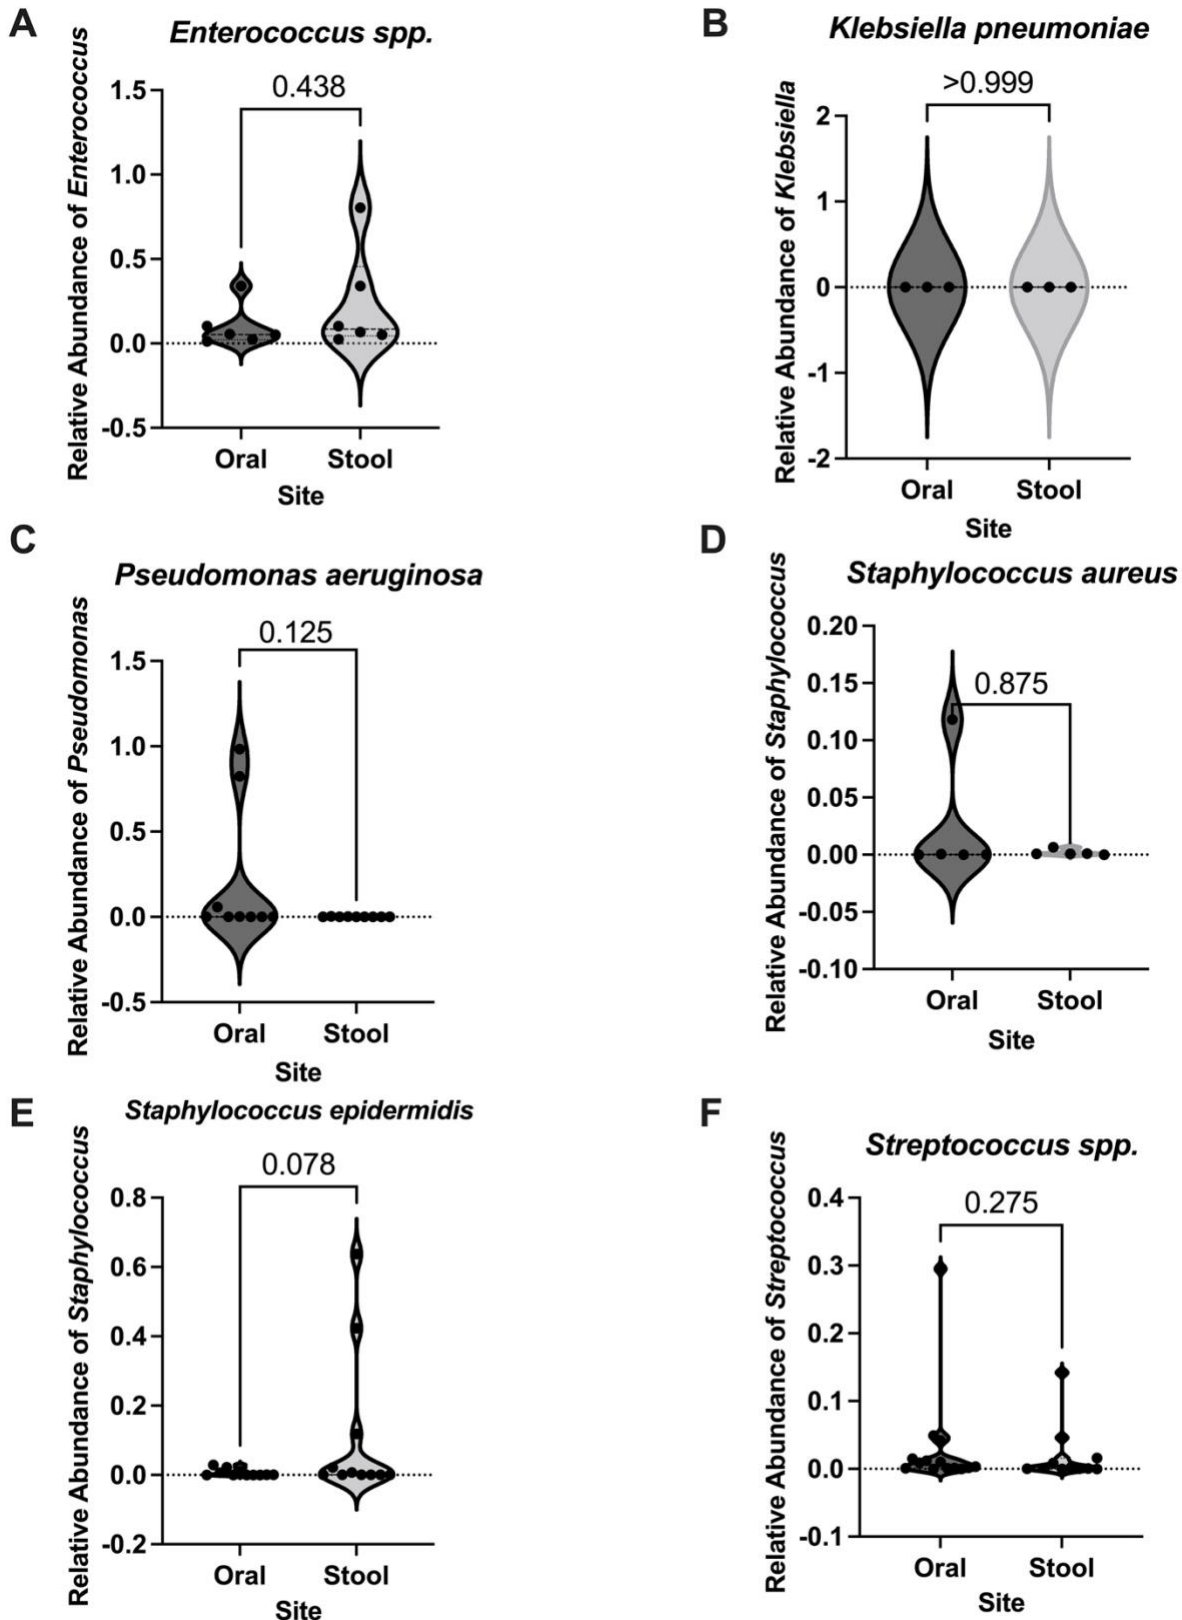

**Supplemental Figure 6. Demonstration of differences in abundance based on site and species specificity.** Demonstration of differences in abundance based on site specificity per species. Mann-Whitney testing was performed using the relative abundance of each genera compared between stool and oral samples of patients infected with A) *Enterococcus spp.*, B) *Klebsiella pneumoniae*, C) *Pseudomonas aeruginosa*, D) *Staphylococcus aureus*, E) *Staphylococcus epidermidis* and F) *Streptococcus spp.*

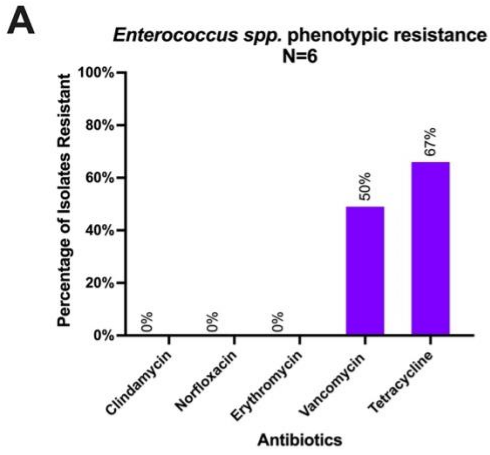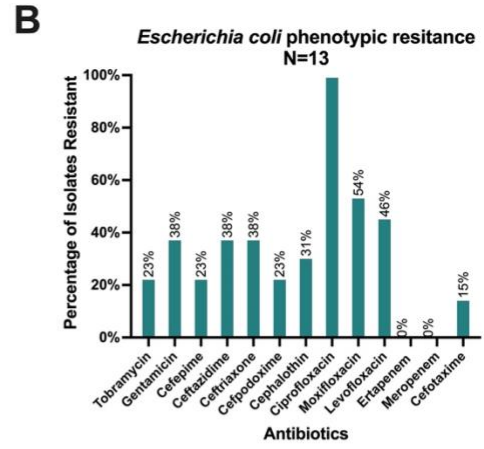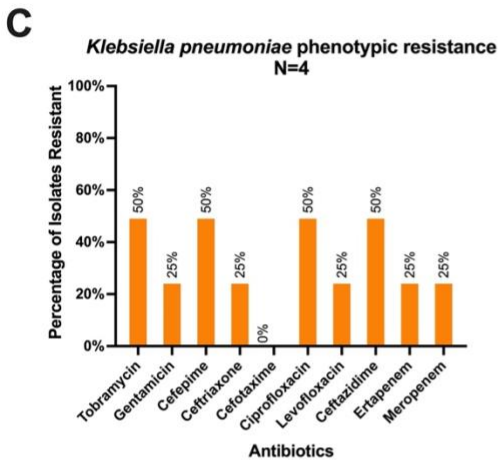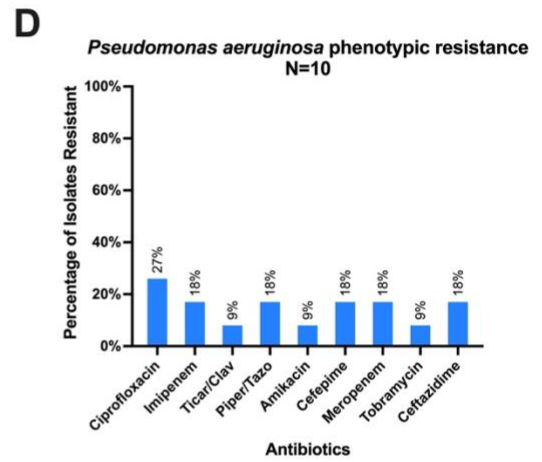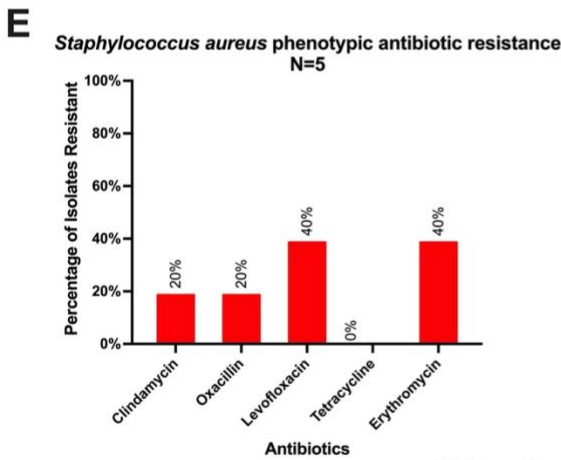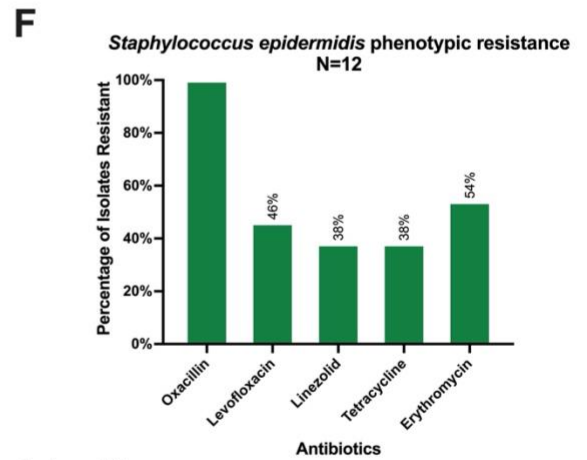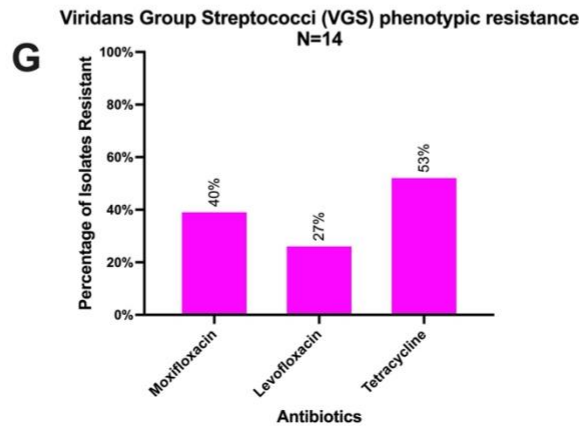

**Supplemental Figure 7. Graphical representation of phenotypic antibiotic resistance.** The percentage of isolates resistant to various antibiotics for A) *Enterococcus spp.*, B) *Escherichia coli*, C) *Klebsiella pneumoniae*, D) *Pseudomonas aeruginosa*, E) *Staphylococcus aureus*, F) *Staphylococcus epidermidis* and G) Viridians Group Streptococci (VGS). Each graph was made by looking at what antibiotics were tested for sensitivity for each species of interest, and determining what percentage of isolates were resistant to each antibiotic.
